# Supplementary material for: GOBO: Gene Expression-Based Outcome for Breast Cancer Online
Source: PLoS One. 2011 Mar 21;6(3):e17911. doi: 10.1371/journal.pone.0017911 (PMC3061871; doi:10.1371/journal.pone.0017911)
Supplement: Table S2 — Result of functional analysis of genes co-expressed with CCNB1 using DAVID. An Excel table showing the results from functional analysis using DAVID for CCNB1 and 34 co-expressed genes. (XLS) [file pone.0017911.s002.xls]

## Sheet: DAVID_chart.txt
Supplementary Table 2. DAVID analysis of CCNB1 and 34 genes significantly coexpressed derived from the GOBO Co-expressed genes (CG) application
Category	Term	Count	%	PValue	Genes	List Total	Pop Hits	Pop Total	Fold Enrichment	Bonferroni	Benjamini	FDR
GOTERM_BP_FAT	GO:0000279~M phase	15	42.8571	1.04833e-15	PRC1, KIF15, KIF18A, NUSAP1, CEP55, PBK, TACC3, CCNB1, CDCA8, OIP5, NCAPG, FBXO5, ASPM, ERCC6L, CDCA3	30	329	13528	20.5593	2.91767e-13	2.91767e-13	1.33227e-12
GOTERM_BP_FAT	GO:0000280~nuclear division	13	37.1429	1.03223e-14	KIF15, KIF18A, NUSAP1, CEP55, PBK, CCNB1, CDCA8, NCAPG, OIP5, FBXO5, ASPM, ERCC6L, CDCA3	30	220	13528	26.6461	3.01492e-12	1.50746e-12	1.37446e-11
GOTERM_BP_FAT	GO:0007067~mitosis	13	37.1429	1.03223e-14	KIF15, KIF18A, NUSAP1, CEP55, PBK, CCNB1, CDCA8, NCAPG, OIP5, FBXO5, ASPM, ERCC6L, CDCA3	30	220	13528	26.6461	3.01492e-12	1.50746e-12	1.37446e-11
GOTERM_BP_FAT	GO:0000087~M phase of mitotic cell cycle	13	37.1429	1.27657e-14	KIF15, KIF18A, NUSAP1, CEP55, PBK, CCNB1, CDCA8, NCAPG, OIP5, FBXO5, ASPM, ERCC6L, CDCA3	30	224	13528	26.1702	3.72813e-12	1.24267e-12	1.69864e-11
GOTERM_BP_FAT	GO:0048285~organelle fission	13	37.1429	1.66858e-14	KIF15, KIF18A, NUSAP1, CEP55, PBK, CCNB1, CDCA8, NCAPG, OIP5, FBXO5, ASPM, ERCC6L, CDCA3	30	229	13528	25.5988	4.86278e-12	1.21569e-12	2.21601e-11
GOTERM_BP_FAT	GO:0007049~cell cycle	18	51.4286	1.79676e-14	PRC1, KIF15, E2F8, KIF18A, NUSAP1, PBK, CEP55, TACC3, RACGAP1, CCNB1, CDCA8, OIP5, NCAPG, HJURP, FBXO5, ASPM, CDCA3, ERCC6L	30	776	13528	10.4598	5.2518e-12	1.05038e-12	2.39364e-11
GOTERM_BP_FAT	GO:0022403~cell cycle phase	15	42.8571	2.59503e-14	PRC1, KIF15, KIF18A, NUSAP1, CEP55, PBK, TACC3, CCNB1, CDCA8, OIP5, NCAPG, FBXO5, ASPM, ERCC6L, CDCA3	30	414	13528	16.3382	7.58593e-12	1.26432e-12	3.45723e-11
GOTERM_BP_FAT	GO:0022402~cell cycle process	16	45.7143	7.71962e-14	PRC1, KIF15, KIF18A, NUSAP1, CEP55, PBK, TACC3, RACGAP1, CCNB1, CDCA8, OIP5, NCAPG, FBXO5, ASPM, CDCA3, ERCC6L	30	565	13528	12.7698	2.25309e-11	3.21865e-12	1.02685e-10
GOTERM_BP_FAT	GO:0000278~mitotic cell cycle	14	40	1.77628e-13	PRC1, KIF15, KIF18A, NUSAP1, CEP55, PBK, CCNB1, CDCA8, NCAPG, OIP5, FBXO5, ASPM, ERCC6L, CDCA3	30	370	13528	17.0623	5.18696e-11	6.4837e-12	2.364e-10
SP_PIR_KEYWORDS	cell cycle	14	40	4.27185e-13	PRC1, E2F8, NUSAP1, CEP55, RACGAP1, CCNB1, CDCA8, NCAPG, HJURP, OIP5, FBXO5, ASPM, ERCC6L, CDCA3	35	461	19235	16.6898	2.81961e-11	2.81961e-11	4.36795e-10
SP_PIR_KEYWORDS	cell division	12	34.2857	5.72084e-13	CCNB1, CDCA8, PRC1, OIP5, NCAPG, NUSAP1, FBXO5, CEP55, RACGAP1, ASPM, ERCC6L, CDCA3	35	264	19235	24.9805	3.77585e-11	1.88792e-11	5.84932e-10
GOTERM_BP_FAT	GO:0051301~cell division	12	34.2857	1.07498e-11	CCNB1, CDCA8, PRC1, OIP5, NCAPG, NUSAP1, FBXO5, CEP55, RACGAP1, ASPM, ERCC6L, CDCA3	30	295	13528	18.3431	3.13895e-09	3.48773e-10	1.43058e-08
SP_PIR_KEYWORDS	mitosis	10	28.5714	2.24001e-11	CCNB1, CDCA8, OIP5, NCAPG, NUSAP1, FBXO5, CEP55, ASPM, ERCC6L, CDCA3	35	183	19235	30.0312	1.47841e-09	4.92802e-10	2.29027e-08
GOTERM_CC_FAT	GO:0015630~microtubule cytoskeleton	13	37.1429	1.94887e-10	KIF4A, PRC1, KIF15, KIF18A, NUSAP1, KIF18B, CEP55, RACGAP1, CCNB1, CDCA8, FBXO5, ASPM, KIF20A	27	549	12782	11.21	1.42267e-08	1.42267e-08	2.03422e-07
GOTERM_CC_FAT	GO:0005819~spindle	9	25.7143	3.31394e-10	CDCA8, KIF4A, PRC1, KIF15, KIF18A, NUSAP1, FBXO5, RACGAP1, ASPM	27	147	12782	28.9841	2.41918e-08	1.20959e-08	3.45907e-07
GOTERM_CC_FAT	GO:0043228~non-membrane-bounded organelle	21	60	8.61632e-10	CENPN, CENPM, KIF4A, PRC1, KIF15, KIF18A, NUSAP1, KIF18B, CEP55, RACGAP1, MLF1IP, CCNB1, MRPL13, CDCA8, OIP5, NCAPG, HJURP, FBXO5, ASPM, KIF20A, ERCC6L	27	2596	12782	3.82957	6.28991e-08	2.09664e-08	8.99365e-07
GOTERM_CC_FAT	GO:0043232~intracellular non-membrane-bounded organelle	21	60	8.61632e-10	CENPN, CENPM, KIF4A, PRC1, KIF15, KIF18A, NUSAP1, KIF18B, CEP55, RACGAP1, MLF1IP, CCNB1, MRPL13, CDCA8, OIP5, NCAPG, HJURP, FBXO5, ASPM, KIF20A, ERCC6L	27	2596	12782	3.82957	6.28991e-08	2.09664e-08	8.99365e-07
SP_PIR_KEYWORDS	phosphoprotein	30	85.7143	1.51868e-08	KIF4A, PRC1, E2F8, CEP55, MCM10, CDCA8, HJURP, NCAPG, OIP5, FBXO5, ASPM, ERCC6L, CDCA3, CENPN, GINS2, DTL, KIF15, KIF18A, ATAD2, NUSAP1, KIF18B, HN1, PBK, RACGAP1, TACC3, ECT2, MLF1IP, CCNB1, SHCBP1, KIF20A	35	7263	19235	2.27002	1.00233e-06	2.50582e-07	1.55275e-05
GOTERM_BP_FAT	GO:0007017~microtubule-based process	9	25.7143	4.0948e-08	KIF4A, PRC1, KIF15, KIF18A, KIF18B, NUSAP1, FBXO5, TACC3, KIF20A	30	253	13528	16.0411	1.19567e-05	1.19568e-06	5.44933e-05
GOTERM_CC_FAT	GO:0044430~cytoskeletal part	13	37.1429	9.87637e-08	KIF4A, PRC1, KIF15, KIF18A, NUSAP1, KIF18B, CEP55, RACGAP1, CCNB1, CDCA8, FBXO5, ASPM, KIF20A	27	952	12782	6.4646	7.20972e-06	1.80244e-06	0.000103089
SP_PIR_KEYWORDS	microtubule	8	22.8571	1.34293e-07	KIF4A, PRC1, KIF15, KIF18A, KIF18B, NUSAP1, RACGAP1, KIF20A	35	231	19235	19.0328	8.86331e-06	1.77267e-06	0.000137307
SP_PIR_KEYWORDS	nucleus	23	65.7143	1.35055e-07	ENY2, CENPN, GINS2, CENPM, KIF4A, PRC1, DTL, E2F8, KIF18A, ATAD2, NUSAP1, HN1, RACGAP1, MCM10, MLF1IP, CCNB1, C12ORF48, CDCA8, OIP5, NCAPG, HJURP, FBXO5, ASPM	35	4283	19235	2.95124	8.91362e-06	1.48561e-06	0.000138086
GOTERM_CC_FAT	GO:0000775~chromosome, centromeric region	7	20	1.4498e-07	CENPN, CDCA8, CENPM, OIP5, HJURP, MLF1IP, ERCC6L	27	124	12782	26.7246	1.05835e-05	2.11671e-06	0.000151329
SMART	SM00129:KISc	5	14.2857	2.74464e-07	KIF4A, KIF15, KIF18A, KIF18B, KIF20A	14	42	9079	77.2024	4.39142e-06	4.39142e-06	0.000194906
INTERPRO	IPR001752:Kinesin, motor region	5	14.2857	3.57457e-07	KIF4A, KIF15, KIF18A, KIF18B, KIF20A	25	42	16659	79.3286	1.96599e-05	1.96599e-05	0.000351588
INTERPRO	IPR019821:Kinesin, motor region, conserved site	5	14.2857	3.57457e-07	KIF4A, KIF15, KIF18A, KIF18B, KIF20A	25	42	16659	79.3286	1.96599e-05	1.96599e-05	0.000351588
SP_PIR_KEYWORDS	centromere	5	14.2857	5.75413e-07	CENPN, CDCA8, OIP5, HJURP, ERCC6L	35	38	19235	72.312	3.79765e-05	5.42531e-06	0.000588323
GOTERM_CC_FAT	GO:0005874~microtubule	8	22.8571	8.94005e-07	KIF4A, PRC1, KIF15, KIF18A, KIF18B, NUSAP1, RACGAP1, KIF20A	27	274	12782	13.8221	6.52603e-05	1.0877e-05	0.000933153
UP_SEQ_FEATURE	domain:Kinesin-motor	5	14.2857	9.80378e-07	KIF4A, KIF15, KIF18A, KIF18B, KIF20A	35	43	19113	63.4983	0.000144105	0.000144105	0.00116663
SP_PIR_KEYWORDS	cytoskeleton	10	28.5714	1.1163e-06	CCNB1, CDCA8, KIF4A, PRC1, KIF15, KIF18A, NUSAP1, FBXO5, CEP55, RACGAP1	35	636	19235	8.64106	7.36728e-05	9.2094e-06	0.00114134
GOTERM_MF_FAT	GO:0003777~microtubule motor activity	5	14.2857	5.15566e-06	KIF4A, KIF15, KIF18A, KIF18B, KIF20A	21	77	12983	40.1453	0.000335063	0.000335063	0.00525451
GOTERM_CC_FAT	GO:0000777~condensed chromosome kinetochore	5	14.2857	5.29631e-06	CENPN, CENPM, HJURP, MLF1IP, ERCC6L	27	58	12782	40.811	0.000386557	5.52315e-05	0.00552811
GOTERM_CC_FAT	GO:0000793~condensed chromosome	6	17.1429	5.37515e-06	CENPN, CENPM, HJURP, NCAPG, MLF1IP, ERCC6L	27	129	12782	22.0189	0.00039231	4.90471e-05	0.0056104
GOTERM_CC_FAT	GO:0005856~cytoskeleton	13	37.1429	5.47721e-06	KIF4A, PRC1, KIF15, KIF18A, NUSAP1, KIF18B, CEP55, RACGAP1, CCNB1, CDCA8, FBXO5, ASPM, KIF20A	27	1381	12782	4.45641	0.000399758	4.44254e-05	0.00571693
GOTERM_CC_FAT	GO:0044427~chromosomal part	8	22.8571	8.68276e-06	CENPN, CDCA8, CENPM, OIP5, HJURP, NCAPG, MLF1IP, ERCC6L	27	386	12782	9.81155	0.000633644	6.33824e-05	0.00906264
GOTERM_CC_FAT	GO:0000779~condensed chromosome, centromeric region	5	14.2857	8.89829e-06	CENPN, CENPM, HJURP, MLF1IP, ERCC6L	27	66	12782	35.8642	0.000649367	5.90508e-05	0.00928759
SP_PIR_KEYWORDS	cytoplasm	18	51.4286	1.27037e-05	CENPM, KIF4A, PRC1, DTL, KIF15, KIF18A, NUSAP1, CEP55, TACC3, RACGAP1, MLF1IP, CCNB1, C12ORF48, CDCA8, NCAPG, FBXO5, ASPM, CDCA3	35	3332	19235	2.96887	0.000838096	9.31565e-05	0.012988
GOTERM_CC_FAT	GO:0000776~kinetochore	5	14.2857	1.64565e-05	CENPN, CENPM, HJURP, MLF1IP, ERCC6L	27	77	12782	30.7407	0.00120062	0.000100106	0.0171759
GOTERM_CC_FAT	GO:0005876~spindle microtubule	4	11.4286	2.63604e-05	KIF4A, PRC1, KIF18A, NUSAP1	27	29	12782	65.2976	0.00192248	0.000148015	0.0275113
GOTERM_CC_FAT	GO:0005694~chromosome	8	22.8571	2.71021e-05	CENPN, CDCA8, CENPM, OIP5, HJURP, NCAPG, MLF1IP, ERCC6L	27	460	12782	8.23317	0.00197653	0.00014131	0.0282854
GOTERM_MF_FAT	GO:0003774~motor activity	5	14.2857	5.79987e-05	KIF4A, KIF15, KIF18A, KIF18B, KIF20A	21	142	12983	21.7689	0.00376293	0.00188324	0.0590964
SP_PIR_KEYWORDS	motor protein	5	14.2857	8.3765e-05	KIF4A, KIF15, KIF18A, KIF18B, KIF20A	35	132	19235	20.8171	0.00551347	0.000552719	0.0856115
GOTERM_BP_FAT	GO:0007018~microtubule-based movement	5	14.2857	9.33038e-05	KIF4A, KIF15, KIF18A, KIF18B, KIF20A	30	113	13528	19.9528	0.0268781	0.00247384	0.124097
SP_PIR_KEYWORDS	coiled coil	13	37.1429	0.000104117	KIF4A, PRC1, KIF15, KIF18A, ATAD2, NUSAP1, KIF18B, CEP55, TACC3, RACGAP1, MLF1IP, ASPM, KIF20A	35	2019	19235	3.5386	0.00684852	0.000624539	0.106402
SP_PIR_KEYWORDS	chromosomal protein	5	14.2857	0.000120503	CENPN, CDCA8, CENPM, HJURP, MLF1IP	35	145	19235	18.9507	0.00792214	0.000662588	0.123139
UP_SEQ_FEATURE	mutagenesis site	13	37.1429	0.000125333	CENPN, PRC1, DTL, E2F8, ATAD2, CEP55, PBK, RACGAP1, MLF1IP, CDCA8, HJURP, FBXO5, ERCC6L	35	2045	19113	3.47145	0.0182564	0.00917026	0.149044
SP_PIR_KEYWORDS	kinetochore	4	11.4286	0.000186364	CENPN, CENPM, MLF1IP, ERCC6L	35	63	19235	34.8934	0.0122258	0.000945794	0.190382
GOTERM_BP_FAT	GO:0000226~microtubule cytoskeleton organization	5	14.2857	0.0002573	PRC1, KIF18A, NUSAP1, FBXO5, TACC3	30	147	13528	15.3379	0.0723877	0.00624222	0.341872
GOTERM_CC_FAT	GO:0031981~nuclear lumen	11	31.4286	0.000327502	ENY2, CCNB1, CDCA8, KIF4A, OIP5, HJURP, E2F8, NUSAP1, FBXO5, MCM10, KIF20A	27	1450	12782	3.59137	0.0236279	0.00159283	0.341316
GOTERM_CC_FAT	GO:0070013~intracellular organelle lumen	12	34.2857	0.000378901	ENY2, CCNB1, CDCA8, KIF4A, MRPL13, OIP5, HJURP, E2F8, NUSAP1, FBXO5, MCM10, KIF20A	27	1779	12782	3.1933	0.0272858	0.00172757	0.394788
GOTERM_CC_FAT	GO:0043233~organelle lumen	12	34.2857	0.000463537	ENY2, CCNB1, CDCA8, KIF4A, MRPL13, OIP5, HJURP, E2F8, NUSAP1, FBXO5, MCM10, KIF20A	27	1820	12782	3.12137	0.0332797	0.00198896	0.48278
GOTERM_CC_FAT	GO:0031974~membrane-enclosed lumen	12	34.2857	0.000550684	ENY2, CCNB1, CDCA8, KIF4A, MRPL13, OIP5, HJURP, E2F8, NUSAP1, FBXO5, MCM10, KIF20A	27	1856	12782	3.06082	0.0394133	0.00223145	0.573309
GOTERM_BP_FAT	GO:0007059~chromosome segregation	4	11.4286	0.000675403	HJURP, NCAPG, KIF18A, NUSAP1	30	81	13528	22.2683	0.179043	0.0150612	0.895096
GOTERM_BP_FAT	GO:0051640~organelle localization	4	11.4286	0.000978504	KIF18A, NUSAP1, TACC3, ASPM	30	92	13528	19.6058	0.248635	0.0202117	1.29437
UP_SEQ_FEATURE	nucleotide phosphate-binding region:ATP	8	22.8571	0.00130419	KIF4A, KIF15, KIF18A, KIF18B, ATAD2, PBK, ERCC6L, KIF20A	35	962	19113	4.54125	0.174562	0.0619454	1.54099
GOTERM_BP_FAT	GO:0007010~cytoskeleton organization	6	17.1429	0.00212872	PRC1, KIF18A, NUSAP1, FBXO5, TACC3, RACGAP1	30	436	13528	6.2055	0.463264	0.0406346	2.79607
GOTERM_BP_FAT	GO:0000070~mitotic sister chromatid segregation	3	8.57143	0.00267199	NCAPG, KIF18A, NUSAP1	30	36	13528	37.5778	0.542173	0.0476561	3.49798
GOTERM_BP_FAT	GO:0000819~sister chromatid segregation	3	8.57143	0.00282093	NCAPG, KIF18A, NUSAP1	30	37	13528	36.5622	0.56171	0.0473637	3.68959
GOTERM_BP_FAT	GO:0051276~chromosome organization	6	17.1429	0.00337814	ENY2, CDCA8, HJURP, NCAPG, KIF18A, NUSAP1	30	485	13528	5.57856	0.627711	0.0534142	4.40332
GOTERM_BP_FAT	GO:0000910~cytokinesis	3	8.57143	0.00345484	PRC1, NUSAP1, RACGAP1	30	41	13528	32.9951	0.635985	0.0517977	4.50119
SP_PIR_KEYWORDS	ubl conjugation	6	17.1429	0.00350558	CCNB1, CDCA8, KIF18A, NUSAP1, MCM10, CDCA3	35	588	19235	5.60787	0.206875	0.016419	3.52684
GOTERM_BP_FAT	GO:0007051~spindle organization	3	8.57143	0.00414903	PRC1, FBXO5, TACC3	30	45	13528	30.0622	0.703004	0.0588962	5.3827
GOTERM_MF_FAT	GO:0005524~ATP binding	8	22.8571	0.00493552	KIF4A, KIF15, KIF18A, KIF18B, ATAD2, PBK, ERCC6L, KIF20A	21	1477	12983	3.34862	0.275014	0.101655	4.91769
GOTERM_MF_FAT	GO:0032559~adenyl ribonucleotide binding	8	22.8571	0.00532184	KIF4A, KIF15, KIF18A, KIF18B, ATAD2, PBK, ERCC6L, KIF20A	21	1497	12983	3.30388	0.293084	0.0830579	5.29325
GOTERM_MF_FAT	GO:0030554~adenyl nucleotide binding	8	22.8571	0.0071054	KIF4A, KIF15, KIF18A, KIF18B, ATAD2, PBK, ERCC6L, KIF20A	21	1577	12983	3.13627	0.370922	0.088533	7.00984
GOTERM_CC_FAT	GO:0005654~nucleoplasm	7	20	0.00740016	ENY2, CCNB1, OIP5, E2F8, FBXO5, MCM10, KIF20A	27	882	12782	3.7572	0.418544	0.0281345	7.46003
SP_PIR_KEYWORDS	atp-binding	8	22.8571	0.00755174	KIF4A, KIF15, KIF18A, KIF18B, ATAD2, PBK, ERCC6L, KIF20A	35	1326	19235	3.31566	0.393655	0.0328037	7.45776
GOTERM_MF_FAT	GO:0001883~purine nucleoside binding	8	22.8571	0.00772059	KIF4A, KIF15, KIF18A, KIF18B, ATAD2, PBK, ERCC6L, KIF20A	21	1601	12983	3.08926	0.395761	0.0805359	7.5954
GOTERM_MF_FAT	GO:0001882~nucleoside binding	8	22.8571	0.00801576	KIF4A, KIF15, KIF18A, KIF18B, ATAD2, PBK, ERCC6L, KIF20A	21	1612	12983	3.06818	0.407334	0.0720078	7.87516
UP_SEQ_FEATURE	short sequence motif:KEN box	2	5.71429	0.00886381	NUSAP1, CDCA3	35	5	19113	218.434	0.729853	0.279058	10.0529
GOTERM_MF_FAT	GO:0015631~tubulin binding	3	8.57143	0.0101958	KIF18A, NUSAP1, RACGAP1	21	100	12983	18.5471	0.486308	0.079894	9.91794
GOTERM_CC_FAT	GO:0005813~centrosome	4	11.4286	0.0102561	CCNB1, KIF15, KIF18A, CEP55	27	224	12782	8.4537	0.528841	0.0369288	10.2018
SP_PIR_KEYWORDS	dna replication	3	8.57143	0.0105568	GINS2, DTL, MCM10	35	88	19235	18.7354	0.503638	0.0428337	10.283
GOTERM_BP_FAT	GO:0000089~mitotic metaphase	2	5.71429	0.0106742	CDCA8, FBXO5	30	5	13528	180.373	0.956441	0.138621	13.3086
GOTERM_BP_FAT	GO:0008283~cell proliferation	5	14.2857	0.0133514	E2F8, KIF15, TACC3, RACGAP1, ASPM	30	436	13528	5.17125	0.980255	0.163395	16.3791
GOTERM_CC_FAT	GO:0005815~microtubule organizing center	4	11.4286	0.0142361	CCNB1, KIF15, KIF18A, CEP55	27	253	12782	7.4847	0.648906	0.0486212	13.9002
GOTERM_BP_FAT	GO:0051323~metaphase	2	5.71429	0.014913	CDCA8, FBXO5	30	7	13528	128.838	0.987567	0.173666	18.1234
GOTERM_MF_FAT	GO:0032555~purine ribonucleotide binding	8	22.8571	0.0160979	KIF4A, KIF15, KIF18A, KIF18B, ATAD2, PBK, ERCC6L, KIF20A	21	1836	12983	2.69385	0.651764	0.1106	15.2449
GOTERM_MF_FAT	GO:0032553~ribonucleotide binding	8	22.8571	0.0160979	KIF4A, KIF15, KIF18A, KIF18B, ATAD2, PBK, ERCC6L, KIF20A	21	1836	12983	2.69385	0.651764	0.1106	15.2449
GOTERM_BP_FAT	GO:0033205~cytokinesis during cell cycle	2	5.71429	0.0191343	NUSAP1, RACGAP1	30	9	13528	100.207	0.996452	0.209474	22.6714
GOTERM_MF_FAT	GO:0017076~purine nucleotide binding	8	22.8571	0.0202001	KIF4A, KIF15, KIF18A, KIF18B, ATAD2, PBK, ERCC6L, KIF20A	21	1918	12983	2.57868	0.734583	0.124224	18.7783
SP_PIR_KEYWORDS	nucleotide-binding	8	22.8571	0.0257789	KIF4A, KIF15, KIF18A, KIF18B, ATAD2, PBK, ERCC6L, KIF20A	35	1686	19235	2.60769	0.821599	0.0964244	23.4351
GOTERM_BP_FAT	GO:0006323~DNA packaging	3	8.57143	0.0258619	HJURP, NCAPG, NUSAP1	30	117	13528	11.5624	0.999524	0.263644	29.4393
UP_SEQ_FEATURE	region of interest:Globular	2	5.71429	0.0263632	KIF4A, KIF20A	35	15	19113	72.8114	0.980305	0.544099	27.2346
GOTERM_BP_FAT	GO:0001556~oocyte maturation	2	5.71429	0.0275245	CCNB1, FBXO5	30	13	13528	69.3744	0.999711	0.269083	31.0253
GOTERM_BP_FAT	GO:0031109~microtubule polymerization or depolymerization	2	5.71429	0.0275245	KIF18A, FBXO5	30	13	13528	69.3744	0.999711	0.269083	31.0253
GOTERM_BP_FAT	GO:0007076~mitotic chromosome condensation	2	5.71429	0.0275245	NCAPG, NUSAP1	30	13	13528	69.3744	0.999711	0.269083	31.0253
GOTERM_BP_FAT	GO:0051726~regulation of cell cycle	4	11.4286	0.0331605	CCNB1, NUSAP1, FBXO5, TACC3	30	331	13528	5.44935	0.999947	0.305599	36.1593
GOTERM_BP_FAT	GO:0007405~neuroblast proliferation	2	5.71429	0.0337717	RACGAP1, ASPM	30	16	13528	56.3667	0.999956	0.301119	36.6943
KEGG_PATHWAY	hsa04114:Oocyte meiosis	2	5.71429	0.0428007	CCNB1, FBXO5	3	110	5085	30.8182	0.196452	0.196452	17.3243
GOTERM_BP_FAT	GO:0048599~oocyte development	2	5.71429	0.0440976	CCNB1, FBXO5	30	21	13528	42.946	0.999998	0.364984	45.1287
GOTERM_MF_FAT	GO:0000166~nucleotide binding	8	22.8571	0.0442439	KIF4A, KIF15, KIF18A, KIF18B, ATAD2, PBK, ERCC6L, KIF20A	21	2245	12983	2.20308	0.947209	0.234634	36.9481
GOTERM_BP_FAT	GO:0009994~oocyte differentiation	2	5.71429	0.0461499	CCNB1, FBXO5	30	22	13528	40.9939	0.999999	0.368646	46.676
GOTERM_BP_FAT	GO:0030261~chromosome condensation	2	5.71429	0.0522815	NCAPG, NUSAP1	30	25	13528	36.0747	1	0.396976	51.0615
GOTERM_MF_FAT	GO:0003677~DNA binding	8	22.8571	0.0528975	C12ORF48, KIF4A, HJURP, E2F8, KIF15, ATAD2, NUSAP1, ERCC6L	21	2331	12983	2.1218	0.970772	0.25501	42.5304
COG_ONTOLOGY	Cytoskeleton	2	5.71429	0.0621361	KIF15, ASPM	5	31	1950	25.1613	0.226324	0.226324	21.7241
GOTERM_BP_FAT	GO:0006260~DNA replication	3	8.57143	0.062196	GINS2, DTL, MCM10	30	190	13528	7.12	1	0.443426	57.453
GOTERM_BP_FAT	GO:0048477~oogenesis	2	5.71429	0.0784147	CCNB1, FBXO5	30	38	13528	23.7333	1	0.514496	66.2681
GOTERM_BP_FAT	GO:0051651~maintenance of location in cell	2	5.71429	0.0980423	TACC3, ASPM	30	48	13528	18.7889	1	0.587781	74.6709
